# Supplementary material for: Unveiling Hidden Risks: Intentional Molecular Screening for Sexually Transmitted Infections and Vaginosis Pathogens in Patients Who Have Been Exclusively Tested for Human Papillomavirus Genotyping
Source: MDPI journal article supplement (doi:10.3390/microorganisms11112661), 2023-10-30
Supplement: s1 [file s1]

***Unveiling Hidden Risks: Intentional Molecular Screening of STI and Vaginosis Pathogens  
in patients who were exclusively tested for HPV Genotyping test***

**Supplementary Table S1.** The primer sequences for COMPLEMENTARY STI PANEL.

| <b>Complementary Table 1.</b> Primers sequences designed for multiplex PCR assay. |                    |                         |
|-----------------------------------------------------------------------------------|--------------------|-------------------------|
| <b>Pathogen</b>                                                                   | <b>Primer Name</b> | <b>Sequence</b>         |
| Molluscum Contagiosum Virus                                                       | M1_MCV_F1          | GCGCGTTTTCGCGGCCTTAAAT  |
|                                                                                   | M1_MCV_R1          | ATAATCGTCACGCGCACGTCGG  |
| Herpes simplex virus                                                              | M1_HSV_F1          | GCCCTGGTCGACCTGCTGTTTT  |
|                                                                                   | M1_HSV_R1          | GTCTGCTCAGTTCGGCGGTGAG  |
| <i>Treponema pallidum</i>                                                         | Primer KO          | CAGAGCCATCAGCCCTTTCA    |
|                                                                                   | Primer KO4         | GTCTGCTCAGTTCGGCGGTGAG  |
| <i>Haemophilus spp.</i>                                                           | M1_Hadu_F1         | AGGCTGACCAAGCCGACGATCT  |
|                                                                                   | M1_Hadu_R1         | AGGCCTTCTTCATTCACGCGGC  |
| <i>Staphylococcus aureus</i>                                                      | M1_Stau_F1         | TTCTGGTGCTGGATCTCGACCT  |
|                                                                                   | M1_Stau_R1         | CGTGCAATTGCTGACCAAGCACG |
| <i>Klebsiella spp.</i>                                                            | M1_Klgr_F1         | GGTTCGAAAGCGGAAGCCTGGG  |
|                                                                                   | M1_Klgr_R1         | TGATCGGGGTCATCTTGCGGGT  |
